# Supplementary material for: Assessing the Impact of Non-Pharmaceutical Interventions on COVID-19: A Combined CCE and Quantile Regression Approach
Source: bioRxiv or medRxiv preprint supplement (doi:10.1101/2023.11.27.23299097), 2024-07-20
Supplement: Supplementary file [file media-1.pdf]

SUPPLEMENTARY MATERIALS FOR:  
TRACKING THE IMPACT OF GOVERNMENT RESPONSE TO  
COVID-19 EPIDEMIC: EVIDENCE FROM INDIA

Kaibalyapati Mishra<sup>1</sup>

<sup>1</sup> CESP, ISEC, Bangalore, India

November 28, 2023

## 1 Detailed table of impact on Deaths at National Levels

|                                                                   | Pooled Model<br>(1)     | With Region FE<br>(2)      | With State FE<br>(3)   |
|-------------------------------------------------------------------|-------------------------|----------------------------|------------------------|
| Stringency                                                        | -0.250***<br>(0.00530)  | -0.260***<br>(0.00552)     | -0.231***<br>(0.00513) |
| Overall                                                           | -0.231***<br>(0.0128)   | -0.224***<br>(0.0130)      | -0.107***<br>(0.0137)  |
| Containment                                                       | 0.494***<br>(0.0136)    | 0.499***<br>(0.0140)       | 0.366***<br>(0.0140)   |
| Temperature                                                       | 0.0222***<br>(0.00240)  | -0.00512<br>(0.00340)      | 0.325***<br>(0.0101)   |
| Rainfall                                                          | -0.004***<br>(0.0002)   | -0.001***<br>(0.0002)      | 0.006***<br>(0.0003)   |
| Population Density                                                | 0.0001***<br>(0.000)    | 0.0001***<br>(0.000)       | 0.008***<br>(0.001)    |
| Per-capita Income                                                 | 0.0001***<br>(0.000)    | 0.0001***<br>(0.000)       | 0.0001***<br>(0.000)   |
| Beds                                                              | 7.00e-08<br>(0.000)     | -0.005*<br>(0.000)         | 0.0002***<br>(0.000)   |
| Hospitals                                                         | -0.0001<br>(0.000)      | 0.0001**<br>(0.000)        | 0.006***<br>(0.0003)   |
| Migrants                                                          | -3.85e-10<br>(1.04e-09) | -1.25e-08***<br>(1.04e-09) | -0.0001***<br>(0.0000) |
| Constant                                                          | 5.687***<br>(0.217)     | 6.924***<br>(0.240)        | -13.58***<br>(0.962)   |
| Weather Controls                                                  | Yes                     | Yes                        | Yes                    |
| Demographic and Economic Controls                                 | Yes                     | Yes                        | Yes                    |
| Health Infrastructure Controls                                    | Yes                     | Yes                        | Yes                    |
| N                                                                 | 32,071                  | 31,182                     | 32,071                 |
| R <sup>2</sup>                                                    | 0.651                   | 0.659                      | 0.728                  |
| Standard errors in parentheses — * p<0.05, ** p<0.01, *** p<0.001 |                         |                            |                        |

TABLE 1: Detailed table of PCSE estimates of the influence of non-pharmaceutical factors on COVID-19 deaths in India at the national level.

## 1.1 Complete table of impact on Deaths at Regional Levels

TABLE 2: Detailed table of PCSE estimates of the influence of non-pharmaceutical factors on COVID-19 deaths in India at the regional level

|                                   | Southern Region               | Western Region               | Eastern Region                 | Central Region                  | Northern Region               | North-Eastern Region          |
|-----------------------------------|-------------------------------|------------------------------|--------------------------------|---------------------------------|-------------------------------|-------------------------------|
|                                   | (1)                           | (2)                          | (3)                            | (4)                             | (5)                           | (6)                           |
| Stringency                        | -0.284***<br>(0.00678)        | -0.250***<br>(0.00816)       | -0.170***<br>(0.0108)          | -0.172***<br>(0.00676)          | -0.251***<br>(0.00638)        | -0.127***<br>(0.00709)        |
| Overall                           | -0.186***<br>(0.0156)         | -0.180***<br>(0.0167)        | -0.0969***<br>(0.0220)         | -0.120***<br>(0.0154)           | -0.177***<br>(0.0146)         | -0.287***<br>(0.0132)         |
| Containment                       | 0.497***<br>(0.0169)          | 0.436***<br>(0.0180)         | 0.272***<br>(0.0270)           | 0.294***<br>(0.0167)            | 0.446***<br>(0.0170)          | 0.379***<br>(0.0139)          |
| Temperature                       | 0.0781***<br>(0.0109)         | -1.059***<br>(0.0443)        | 0.474***<br>(0.0255)           | 1.661***<br>(0.0602)            | -0.00397<br>(0.00563)         | 0.538***<br>(0.0168)          |
| Rainfall                          | 0.0218***<br>(0.00117)        | 0.00252*<br>(0.00106)        | 0.0211***<br>(0.00148)         | -0.00119<br>(0.000832)          | 0.0126***<br>(0.000746)       | -0.0121***<br>(0.000528)      |
| Population Density                | 0.000901***<br>(0.0000239)    |                              |                                |                                 | 0.0000967***<br>(0.00000753)  | 0.00132***<br>(0.000278)      |
| Per-capita Income                 | -0.0000110***<br>(0.00000163) | 0.0000381***<br>(0.00000633) | 0.000152***<br>(0.0000128)     | -0.000214***<br>(0.0000141)     | 0.00000572***<br>(0.00000164) | -0.0000508***<br>(0.00000215) |
| Beds                              | -0.0000266***<br>(0.00000160) | 0.000185***<br>(0.0000423)   | -0.000513***<br>(0.0000430)    | -0.00135***<br>(0.0000731)      | 0.0000387***<br>(0.00000432)  | -0.00139***<br>(0.0000533)    |
| Hospitals                         | 0.000141***<br>(0.00000841)   |                              | -0.00260***<br>(0.000269)      | 0.0332***<br>(0.00185)          | 0.000350***<br>(0.0000929)    | 0.0287***<br>(0.00110)        |
| Migrants                          | -7.38e-08***<br>(3.39e-09)    | -8.60e-08***<br>(2.00e-08)   | 0.00000353***<br>(0.000000275) | -0.00000516***<br>(0.000000294) | -0.000000114***<br>(2.21e-08) | 0.000000139***<br>(4.84e-09)  |
| Constant                          | 3.459***<br>(0.523)           | 25.02***<br>(1.868)          | -8.652***<br>(0.648)           | 5.060***<br>(1.343)             | 4.249***<br>(0.497)           | 2.431***<br>(0.351)           |
| Weather Controls                  | Yes                           | Yes                          | Yes                            | Yes                             | Yes                           | Yes                           |
| Demographic and Economic Controls | Yes                           | Yes                          | Yes                            | Yes                             | Yes                           | Yes                           |
| Health Infrastructure Controls    | Yes                           | Yes                          | Yes                            | Yes                             | Yes                           | Yes                           |
| N                                 | 6,873                         | 2,939                        | 4,012                          | 3,935                           | 7,007                         | 6,416                         |
| R <sup>2</sup>                    | 0.695                         | 0.766                        | 0.773                          | 0.778                           | 0.697                         | 0.677                         |

Standard errors in parentheses —  $p < 0.05^*$ ,  $p < 0.01^{**}$ ,  $p < 0.001^{***}$

## 2 Fitted predicted values of death on Stringency

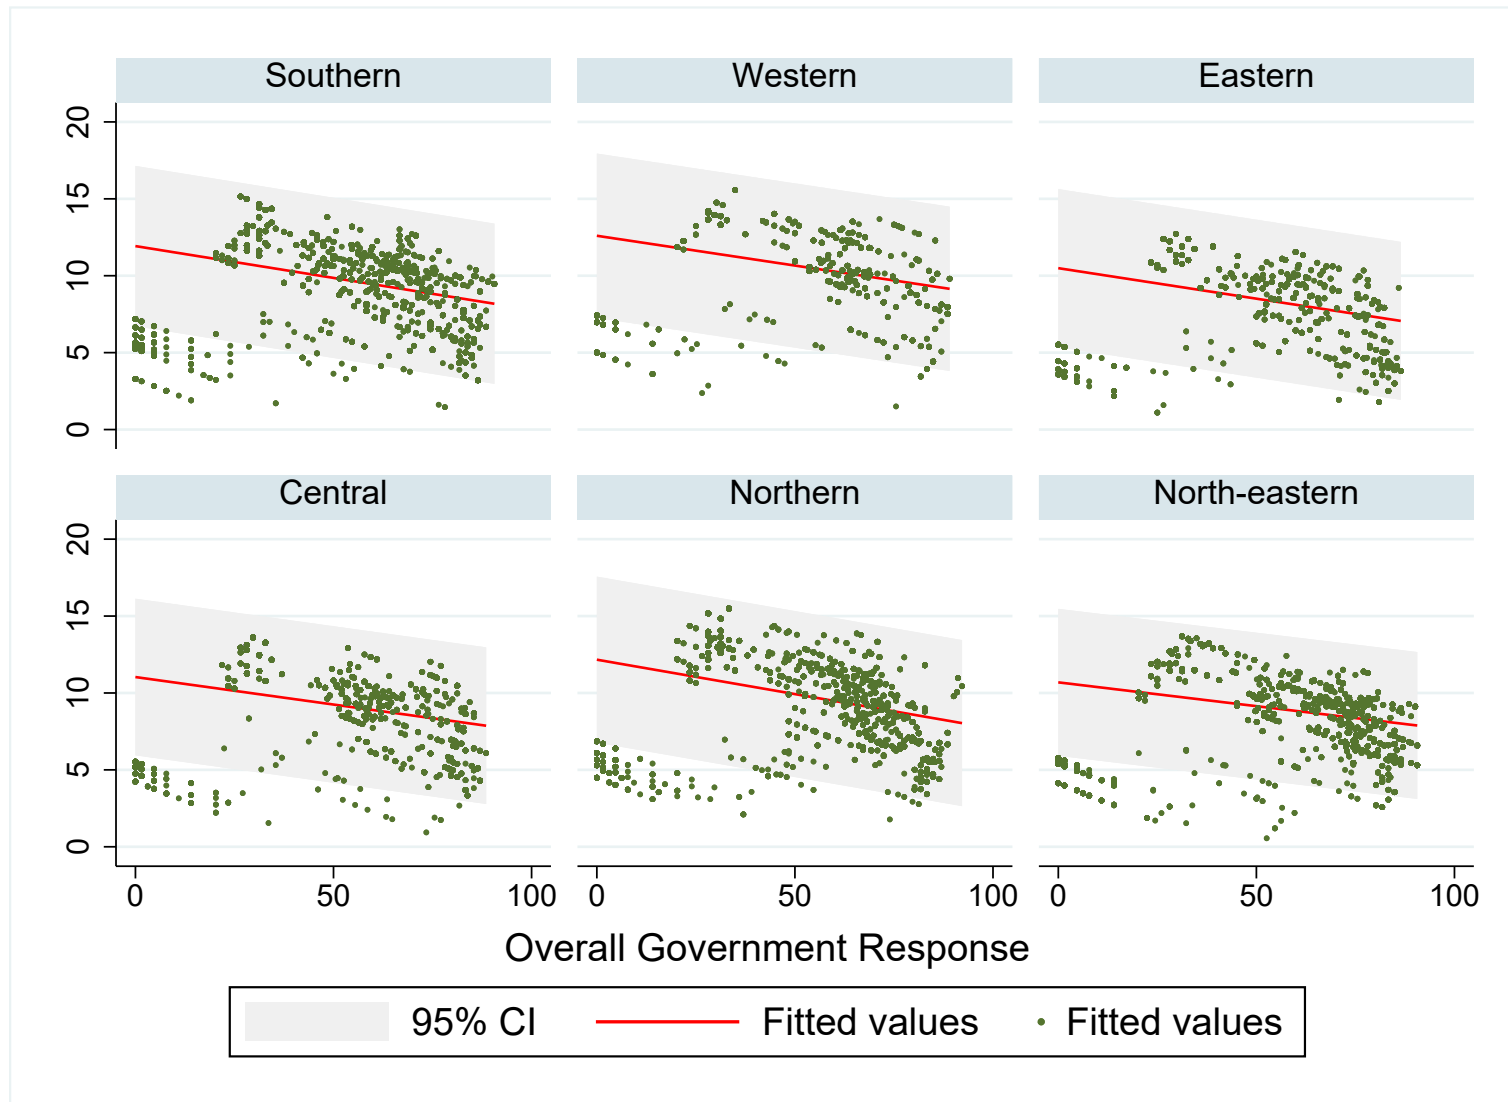

FIGURE 1: Fitted predicted values of dependent variable on Stringency intervention across regions

## 2.1 Fitted predicted values of death on Government Response

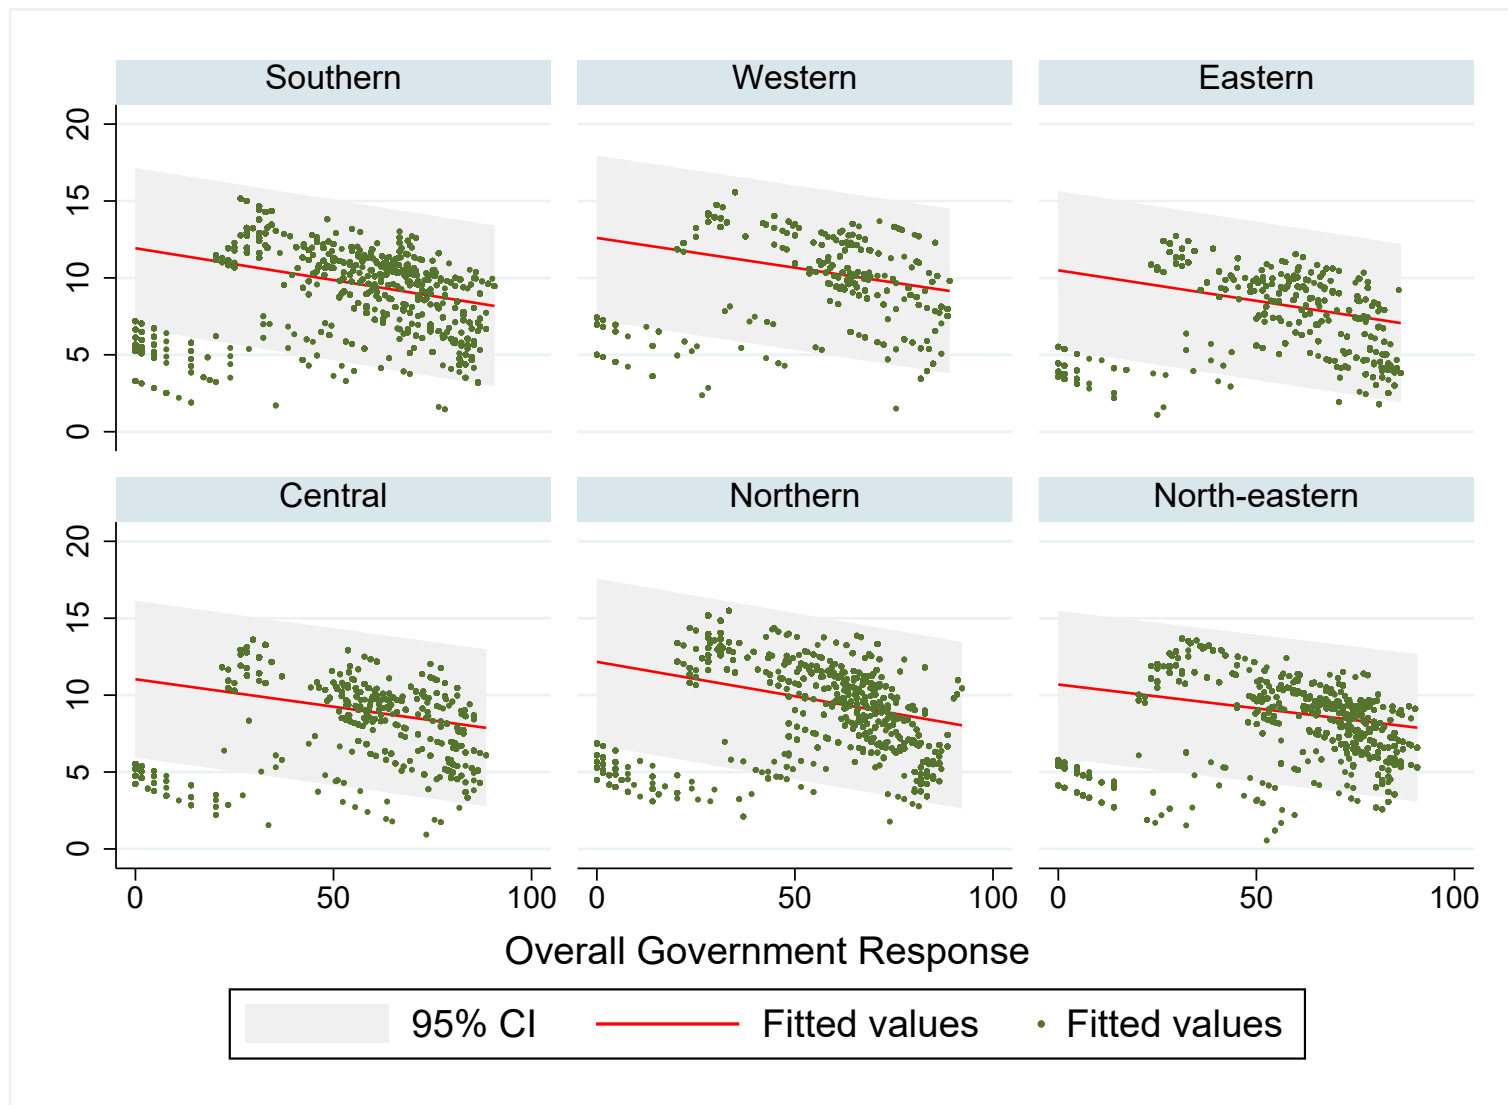

FIGURE 2: Fitted predicted values of dependent variable on overall government response intervention across regions

### 3 Fitted values of death on Stringency across states

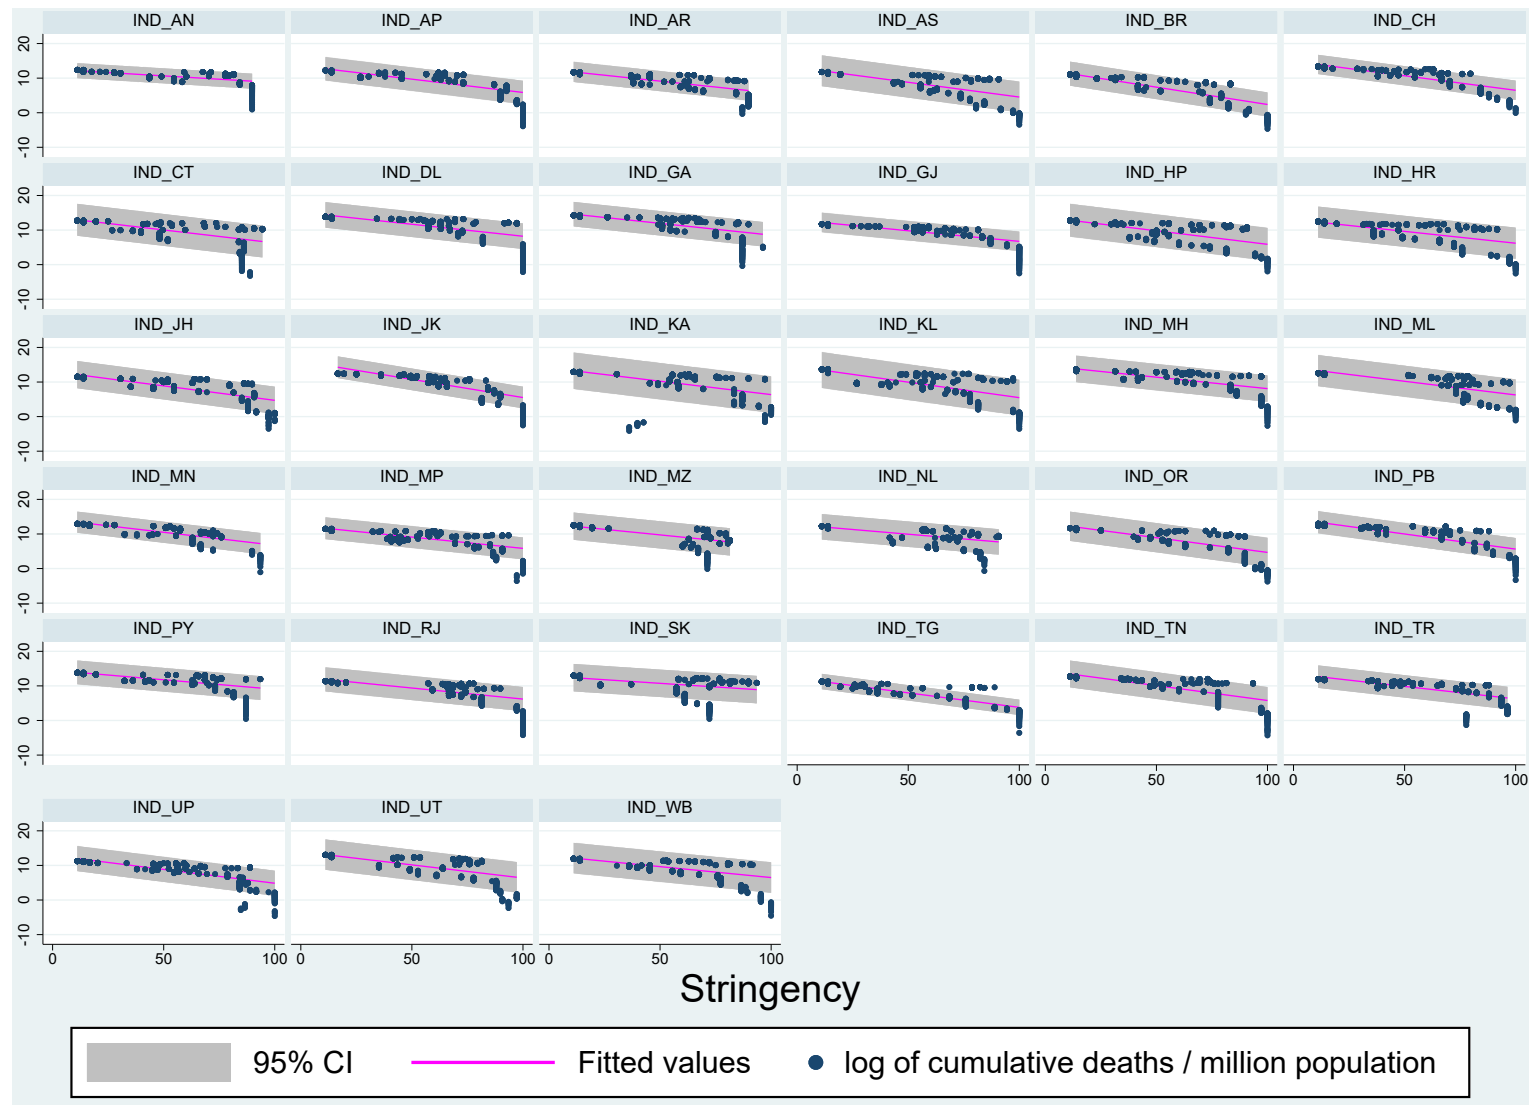

FIGURE 3: Fitted values of dependent variable on stringency intervention across states

### 3.1 Fitted predicted values of death on Stringency across states

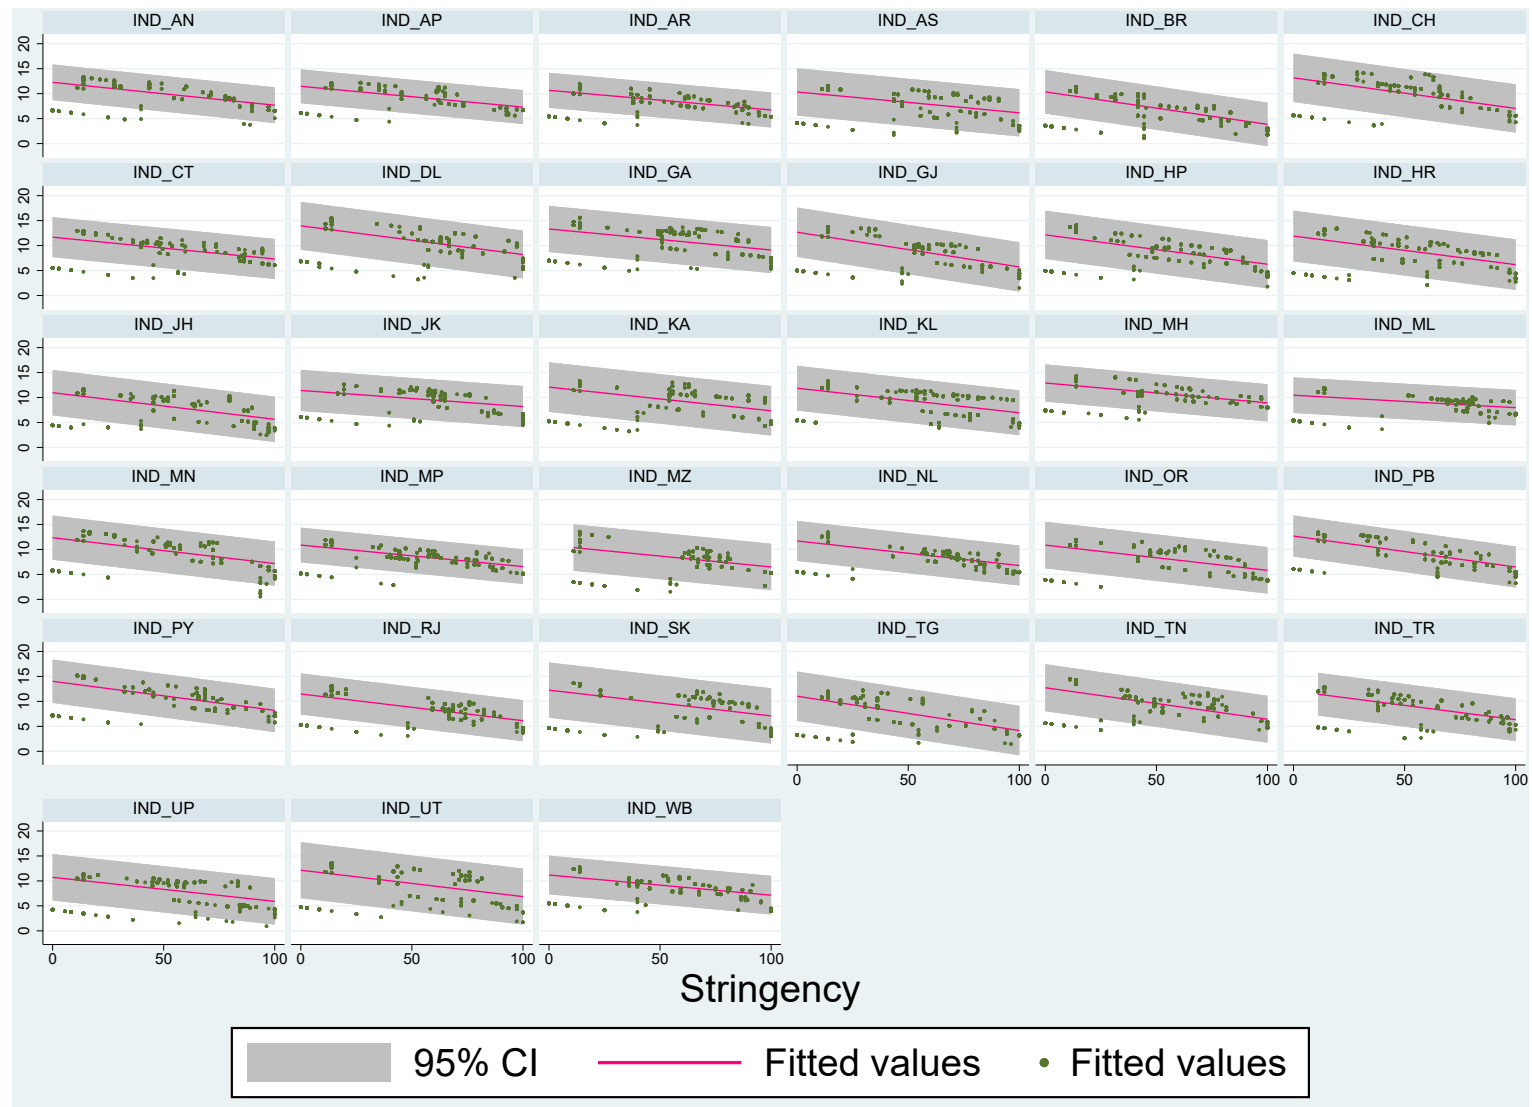

FIGURE 4: Fitted predicted values of dependent variable on stringency intervention across states

### 3.2 Fitted values of death on Overall Government Response across states

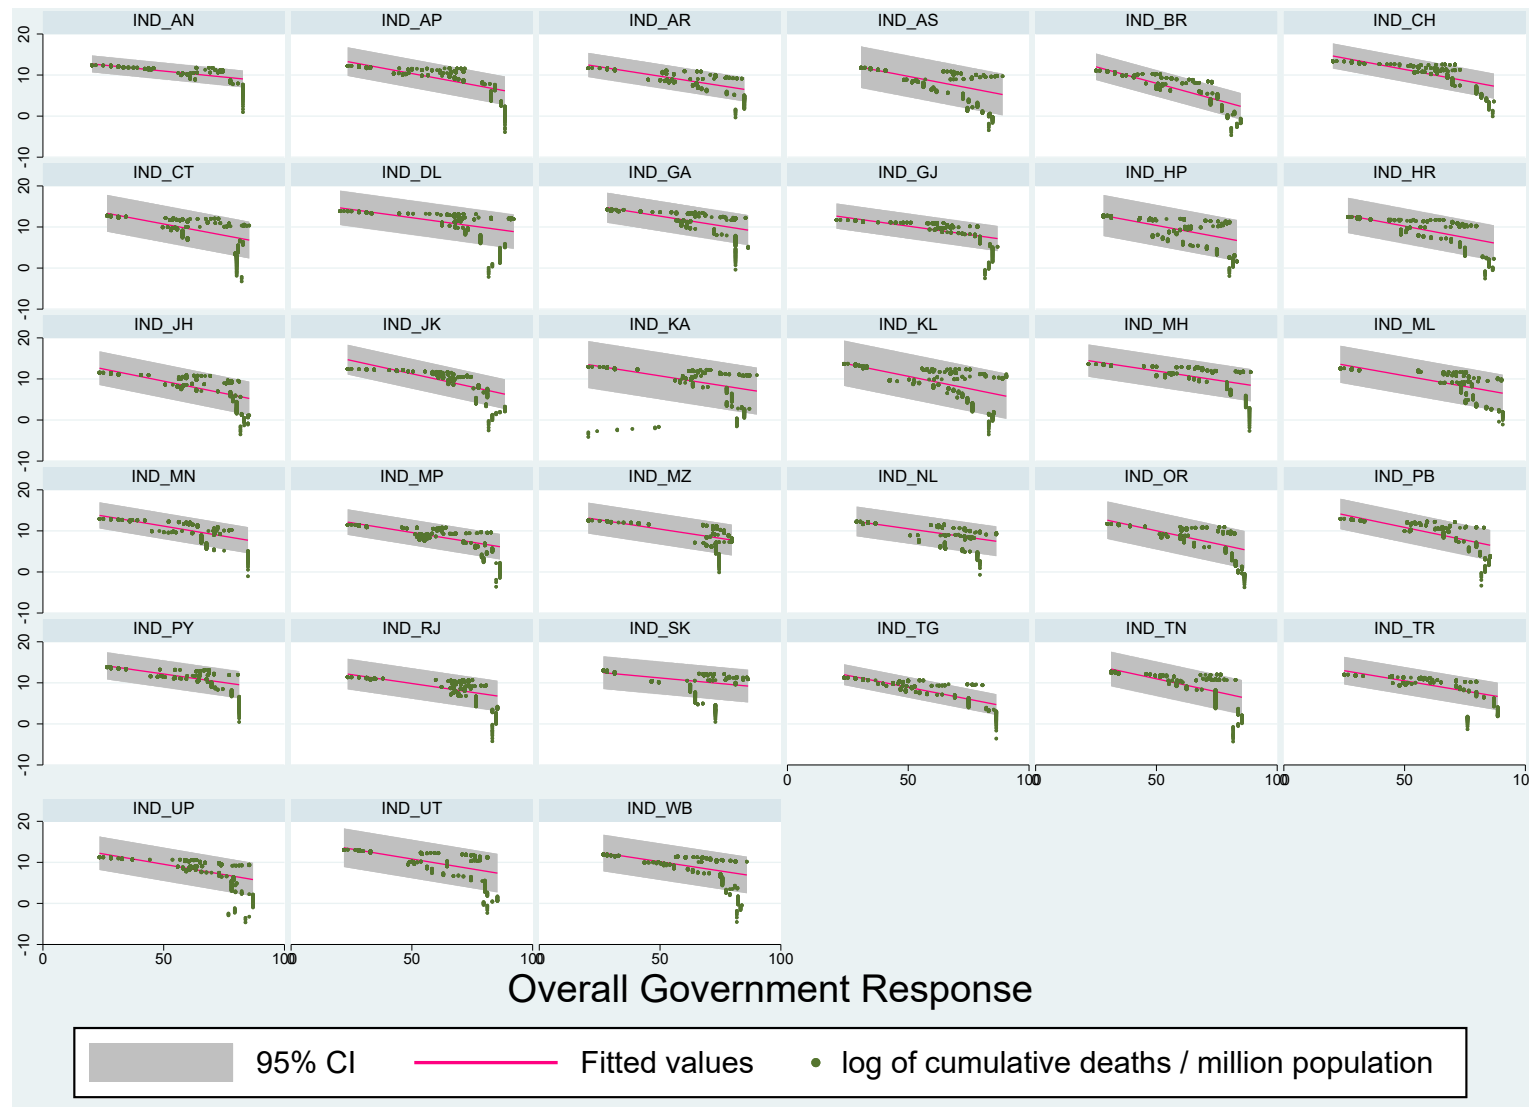

FIGURE 5: Fitted values of dependent variable on government response across states

### 3.3 Fitted values of death on Stringency across states

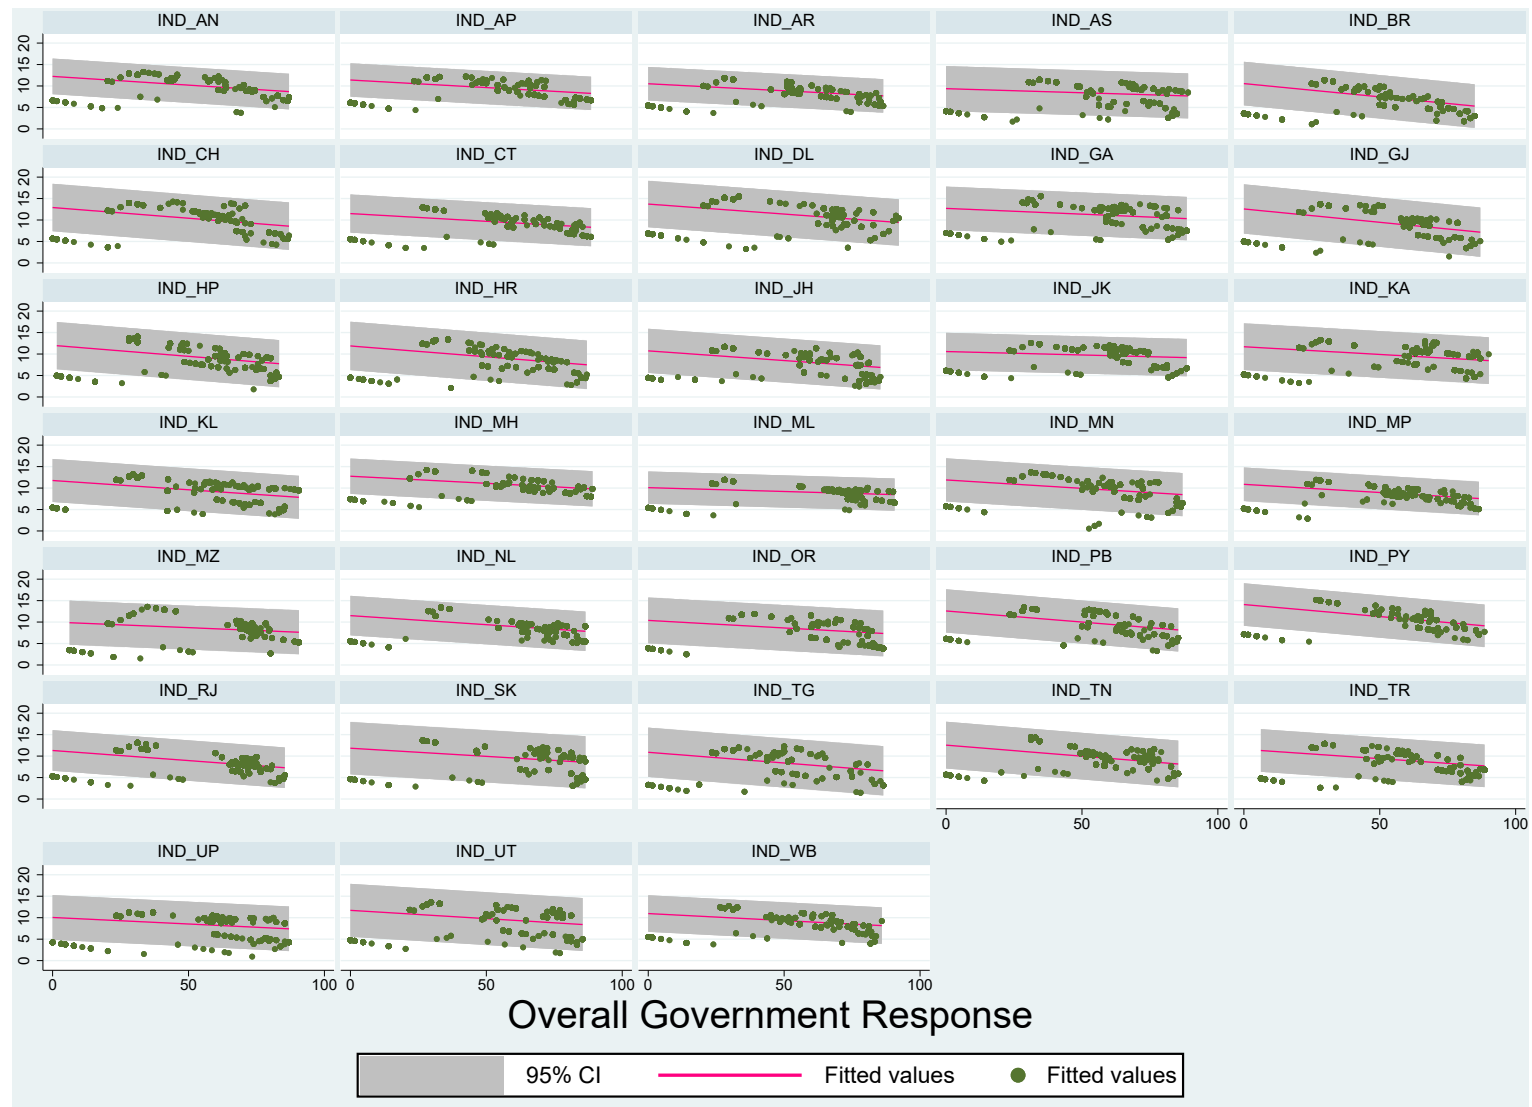

FIGURE 6: Fitted predicted values of dependent variable on government response across states
